# Supplementary material
Source: PubMed Central journal article supplement (PMC6226046)
Supplement: NIHMS1505029-supplement-01.pdf [file NIHMS1505029-supplement-01.pdf]

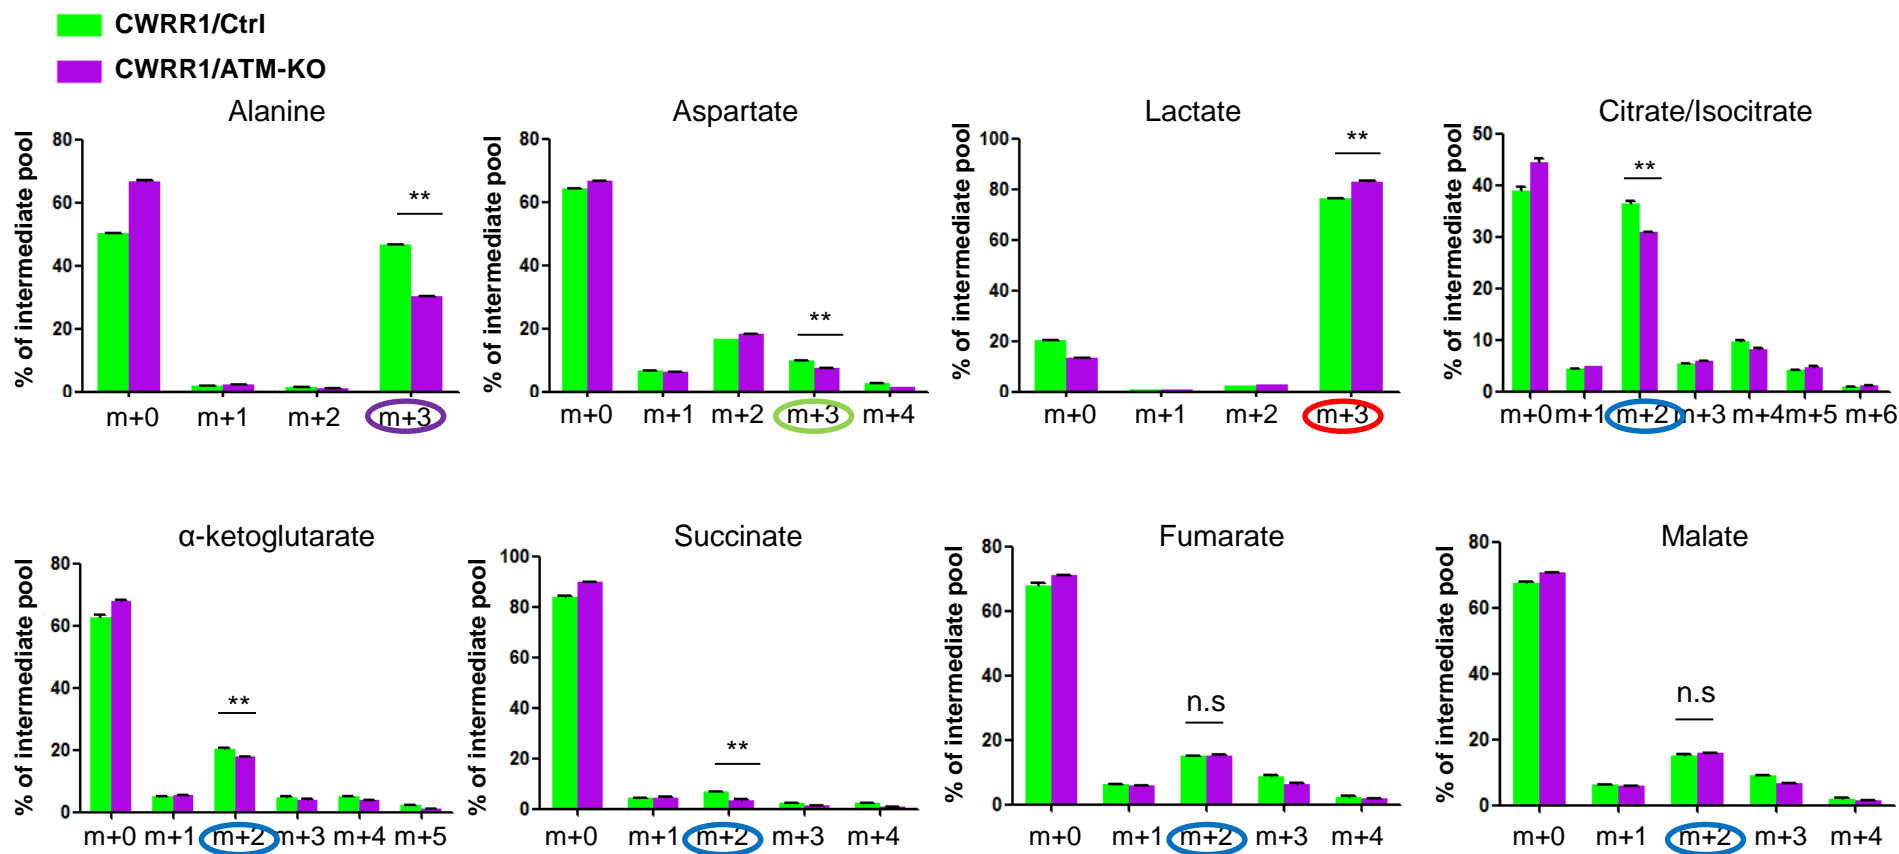

**Supplementary Figure 1.**  $^{13}\text{C}$ -isotopomer tracing analysis of glucose-derived metabolites including alanine, aspartate, lactate and TCA cycle intermediates (citrate/isocitrate,  $\alpha$ -ketoglutarate, succinate, fumarate and malate) in CWRR1/Ctrl and CWRR1/ATM-KO cells. \*\*  $p < 0.01$  by two-tailed Student's  $t$ -test. n.s. no significance.
