# Supplementary material
Source: PubMed Central journal article supplement (PMC6226046)
Supplement: NIHMS1505029-supplement-02.pdf [file NIHMS1505029-supplement-02.pdf]

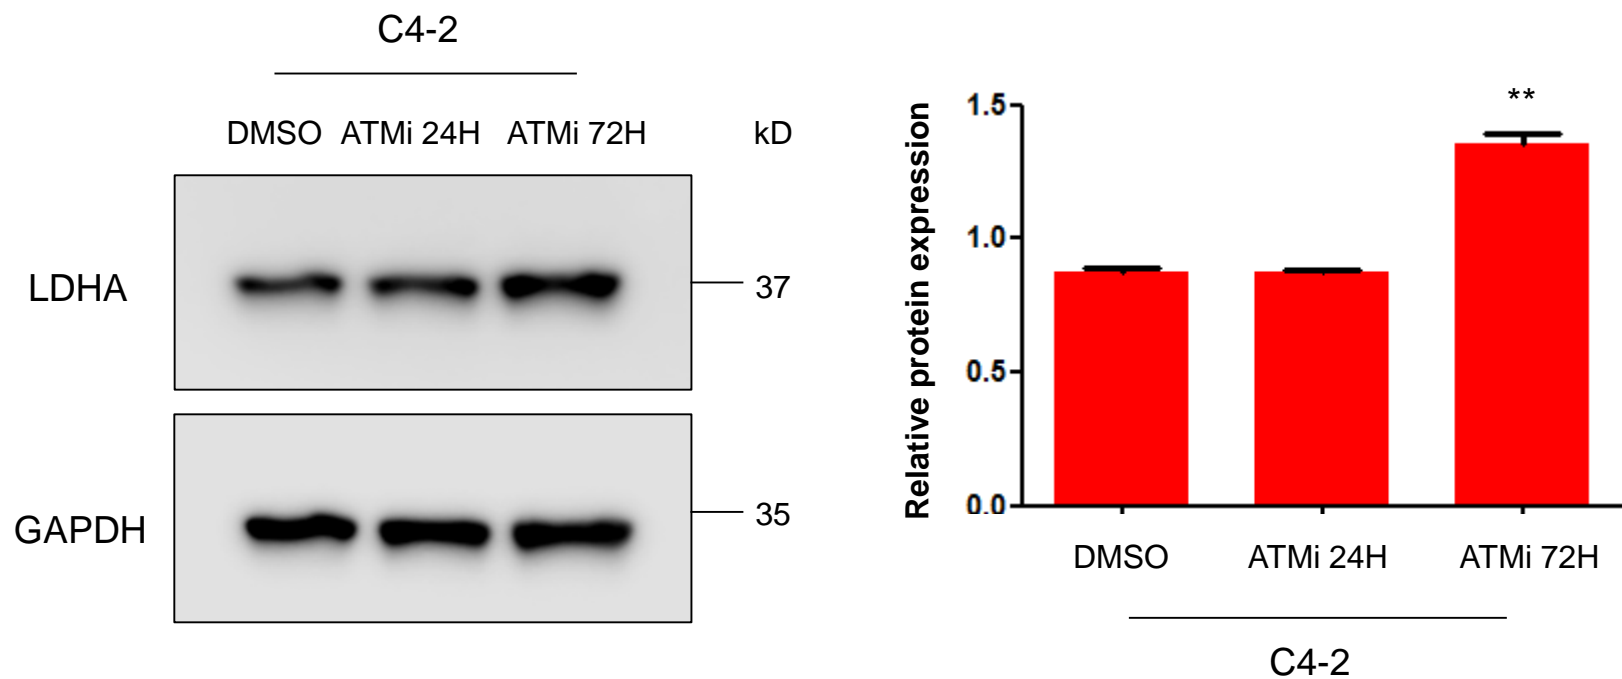

**Supplementary Figure 2.** Inhibition of ATM increased LDHA expression. 5 $\mu$ M ATM inhibitor KU-60019 was used to treat parental C4-2 cells for 24 and 72 hours. *Left*, representative images of immunoblotting. *Right*, the relative density of LDHA normalized to GAPDH. \*\*  $p < 0.01$  by two-tailed Student's  $t$ -test.
