# Supplementary material
Source: PubMed Central journal article supplement (PMC6226046)
Supplement: NIHMS1505029-supplement-03.pdf [file NIHMS1505029-supplement-03.pdf]

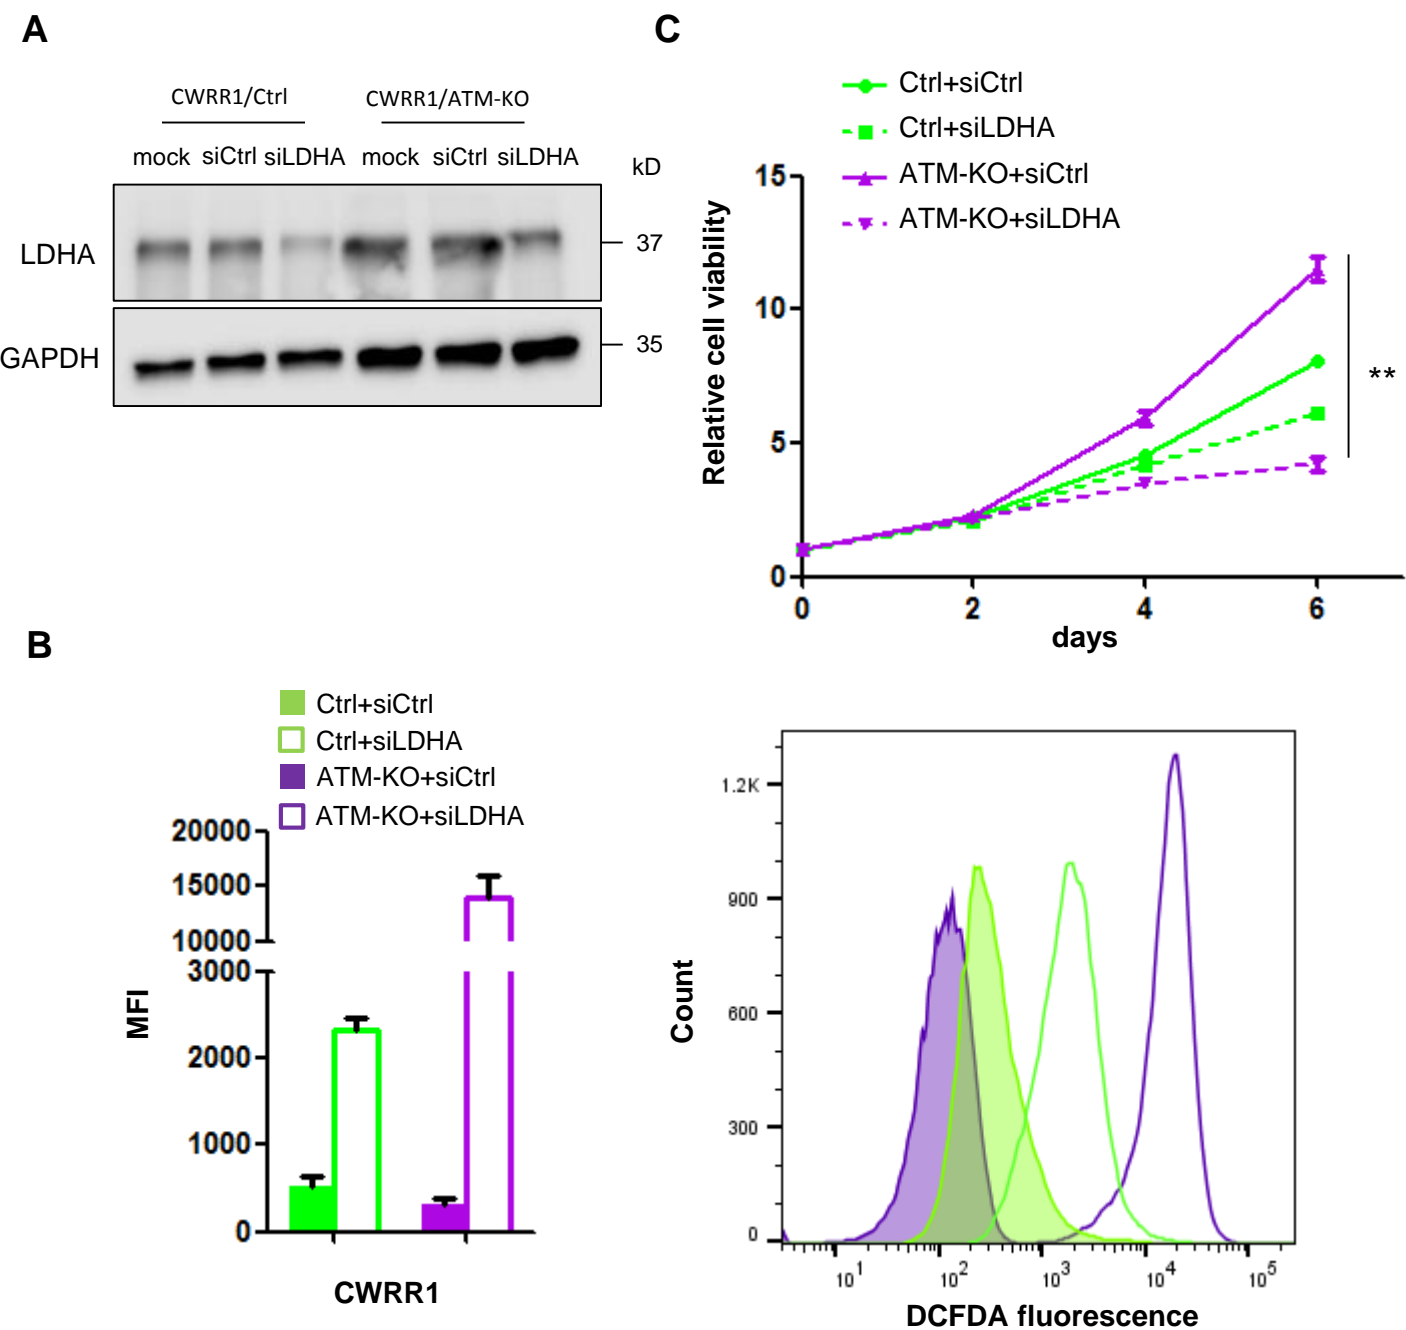

**Supplementary Figure 3.** ATM deficiency upregulates LDHA to promote CRPC progression. **(A)** Western blot showing the knockdown of LDHA expression by using siRNAs in both CWRR1/Ctrl and CWRR1/ATM-KO cells. **(B)** Intracellular ROS production was detected with DCFDA fluorescence and monitored by flow cytometry at 24 hours post-transfection with siCtrl or siLDHA. *Left*, median fluorescent intensity. *Right*, the representative image of histograms of ROS. **(C)** Cell viability of CWRR1/Ctrl and CWRR1/ATM-KO cells transfected with either siCtrl or siLDHA was determined by MTS assay at the indicated time points ( $n = 3$  replicates). \*\*  $p < 0.01$  by two-tailed Student's  $t$ -test.
