# Supplementary material
Source: PubMed Central journal article supplement (PMC6226046)
Supplement: NIHMS1505029-supplement-04.pdf [file NIHMS1505029-supplement-04.pdf]

**A**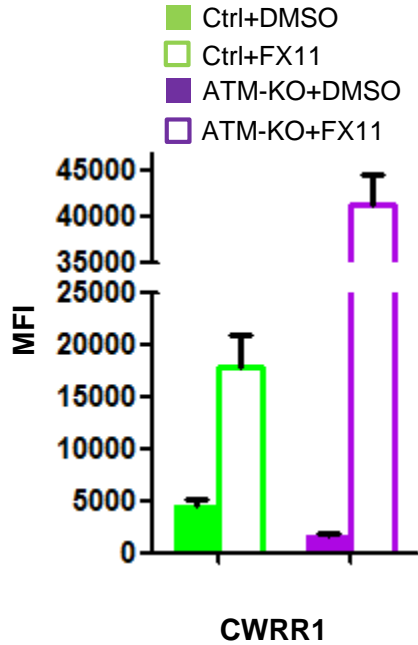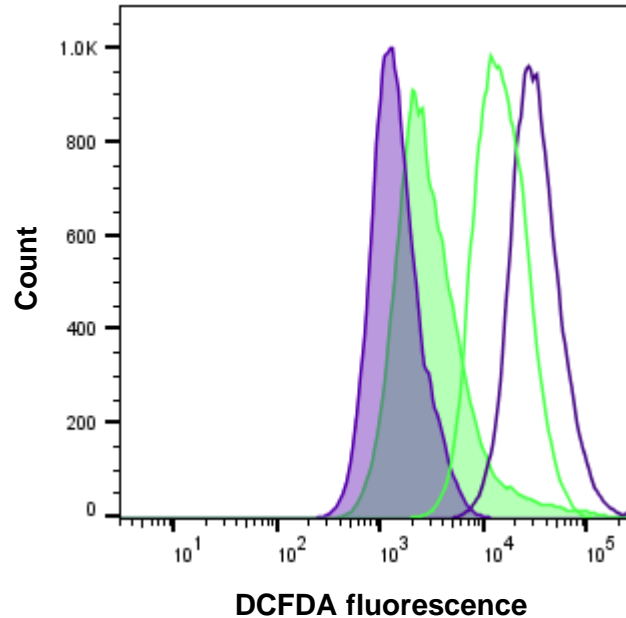**B**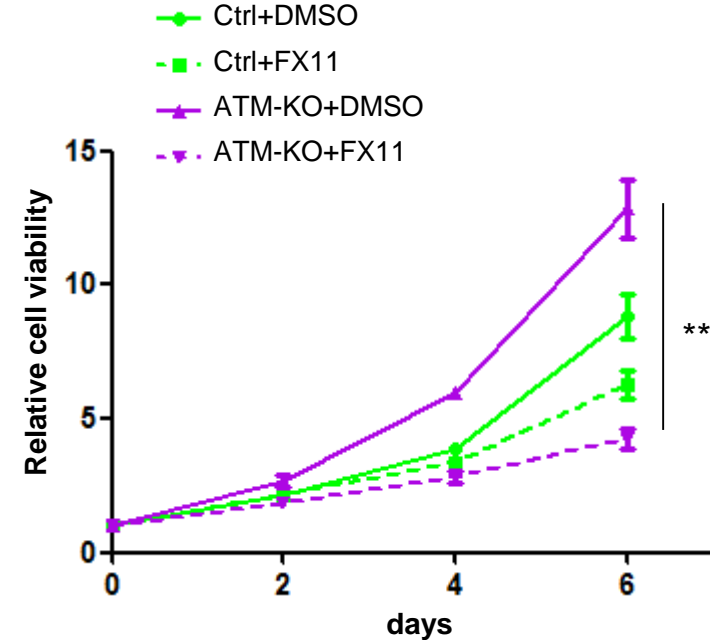

**Supplementary Figure 4.** LDHA inhibitor FX11 suppressed ATM-deficient CWRR1 cell growth. **(A)** Intracellular ROS production was detected with DCFDA fluorescence and monitored by flow cytometry at 72 hours post-treatment with either DMSO or 3  $\mu$ M FX11. *Left*, median fluorescent intensity. *Right*, the representative image of histograms of ROS. **(B)** Cell viability of CWRR1/Ctrl and CWRR1/ATM-KO cells treated with either DMSO or FX11 was determined by MTS assay at the indicated time points ( $n = 3$  replicates). \*\*  $p < 0.01$  by two-tailed Student's  $t$ -test.
